# Supplementary material for: A high-fat diet induced depression-like phenotype via hypocretin-HCRTR1 mediated inflammation activation
Source: Royal Society of Chemistry journal article supplement (doi:10.1039/d4fo00210e), 2024-01-01
Supplement: d4fo00210e1.pdf [file d4fo00210e1.pdf]

## Supplementary materials

Table S1: The list of primers used in RT-qPCR for rat

| Gene     | Primer sequences (Forward) | Primer sequences (Reverse) |
|----------|----------------------------|----------------------------|
| Il6      | GCAAGAGACTTCCAGCCAGT       | GCAAGAGACTTCCAGCCAGT       |
| Il1b     | TGACTTCACCATGGAACCCG       | TCCTGGGGAAGGCATTAGGA       |
| Tnf      | GGGCTCCCTCTCATCAGTTC       | CCTTTCCTCCCAAACCAAAGC      |
| Hcrtr1   | GCTCTTGAACAGCAGAGGGT       | ACCGAATCATGGCTCTTCGG       |
| Pparg    | TGCTGGTGATCAGAAGGCTG       | TGGCATCTCTGTGTCAACCAT      |
| Ppargc1a | TTCAGGAGCTGGATGGCTTG       | GGGCAGCACACTCTATGTCA       |
| Rela     | TCCAGTGTGTGAAGAAGCGA       | TTGTTGGTCTGGATGCGCTG       |
| Tlr4     | TGAGTTCTGAACGTCGAAAAGA     | GGGGAAGTGGCAACTGATGA       |
| Actb     | TGGAGCAAACATCCCCAAA        | TGCCGTGGATACTTGGAGTG       |

Abbreviation : Il6, interleukin 6; Il1b, interleukin 1 beta; Tnf, tumor necrosis factor; Hcrtr, hypocretin receptor 1; Pparg, peroxisome proliferator-activated receptor gamma; Ppargc1a, PPARG coactivator 1 alpha; Rela, RELA proto-oncogene, NF-kB subunit; Tlr4, toll-like receptor 4; Actb, actin, beta.

Table S2: The list of primers used in RT-qPCR for cells

| Gene   | Primer sequences (Forward) | Primer sequences (Reverse) |
|--------|----------------------------|----------------------------|
| Srebf1 | CAGCAGTGAGTCTGCCTTGA       | CAGCAGTGAGTCTGCCTTGA       |
| Cebpa  | CTAGGAGATTCGGTGTGGC        | CCCGAGAGGAAGCAGGAATC       |
| Pparg  | GGCATTGTGAGACATCCCCA       | GGCATTGTGAGACATCCCCA       |
| Il6    | ACCAGTGAAGTAAAGACGCA       | GGCGGCTTAGTTAGATCCCT       |
| Il1b   | TGCCACCTTTTGACAGTGATG      | TGATGTGCTGCTGCGAGATT       |
| Tnf    | GGCAGTTAGGCATGGGATGA       | TCCACTTGGTGGTTTGCTGA       |
| Actb   | GTAAGTCTGTGTGGATCGGTGG     | AACGCAGCTCAGTAACAGTCC      |

Abbreviation : Srebf1, sterol regulatory element binding transcription factor 1; Cebpa, enhancer binding protein alpha; Pparg, peroxisome proliferator activated receptor gamma; Il6, interleukin 6; Il1b, interleukin 1 beta; Tnf, tumor necrosis factor; Actb, actin, beta.

Supplementary Table 3 Ingredient of TP23302 and TP23300

| Ingredient g/kg    | TP23302  | TP23300  |
|--------------------|----------|----------|
| Casein             | 189      | 267      |
| Maltodextrin       | 108      | 157      |
| Sucrose            | 67       | 89       |
| Corn Starch        | 497      | 0        |
| Soybean Oil        | 21       | 33       |
| Lard               | 21       | 301      |
| Cellulose          | 48       | 67       |
| Mineral Mix, M1020 | 36       | 66       |
| Vitamin Mix, V1010 | 9        | 13       |
| L-Cystine          | 2        | 4        |
| Choline Bitartrate | 2        | 3        |
| TBHQ               | 0.067    | 0.067    |
| Total              | 1000.067 | 1000.067 |

The purified diet TP 23,300 supplies energy as 20.6% carbohydrate (7% sucrose calories), 19.4% protein, 60% fat with total 5.0 kcal/g; and the purified diet TP23302 supplies energy as 70% carbohydrate (7% sucrose calories), 20% protein, 10% fat with total 3.8 kcal/g.

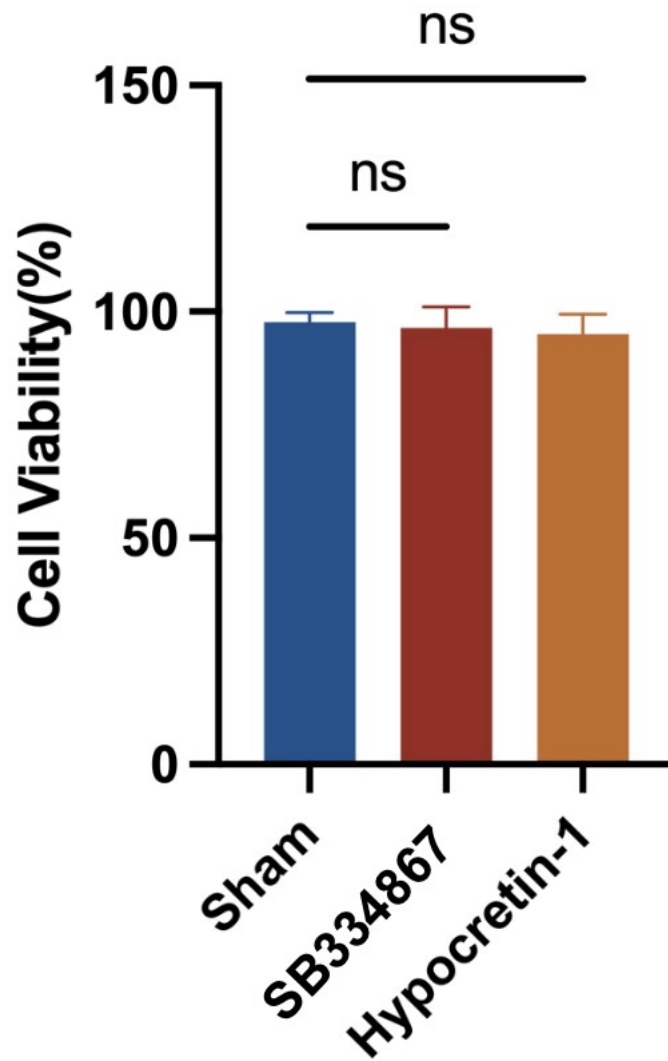

Figure S1 Cell viability assays in 3T3-L1 cells after dosing, hypocretin and antagonists had no significant effect on cell viability(n=5).

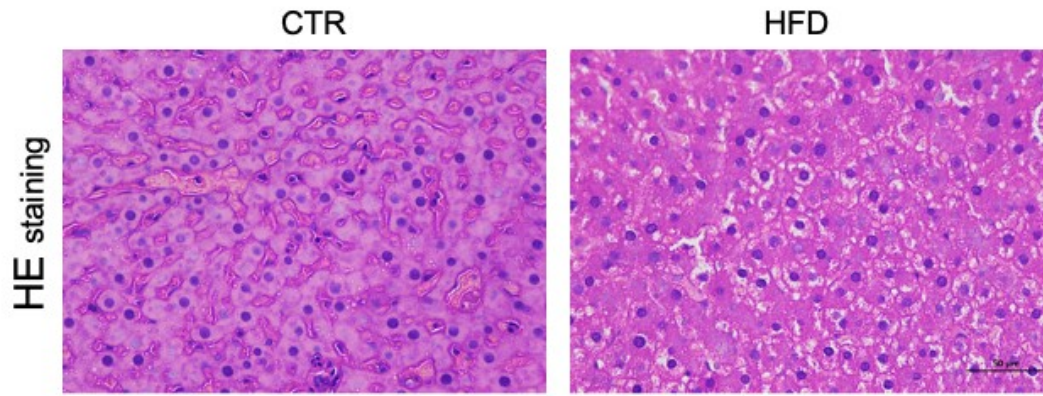

Figure S2 HE staining was performed on the liver of rats in HFD and CTR groups, and there was a gap caused by fat in the liver of HFD group.

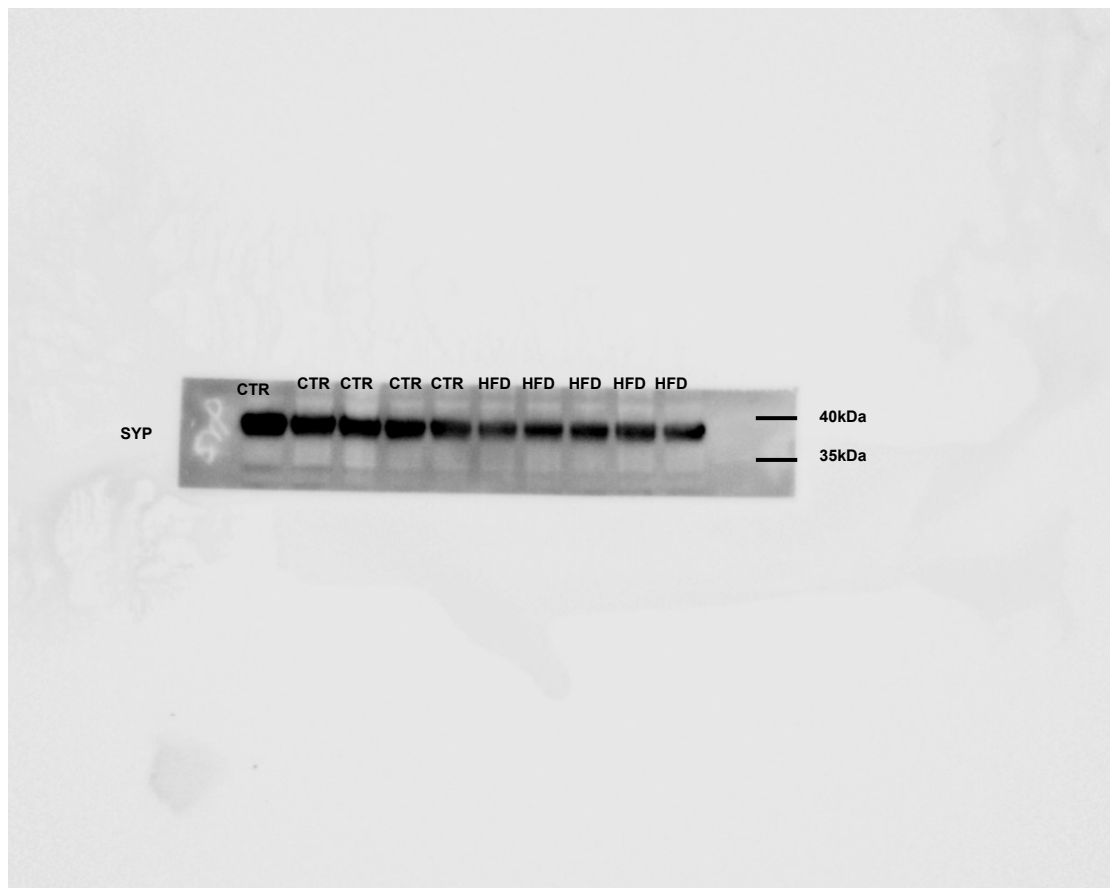

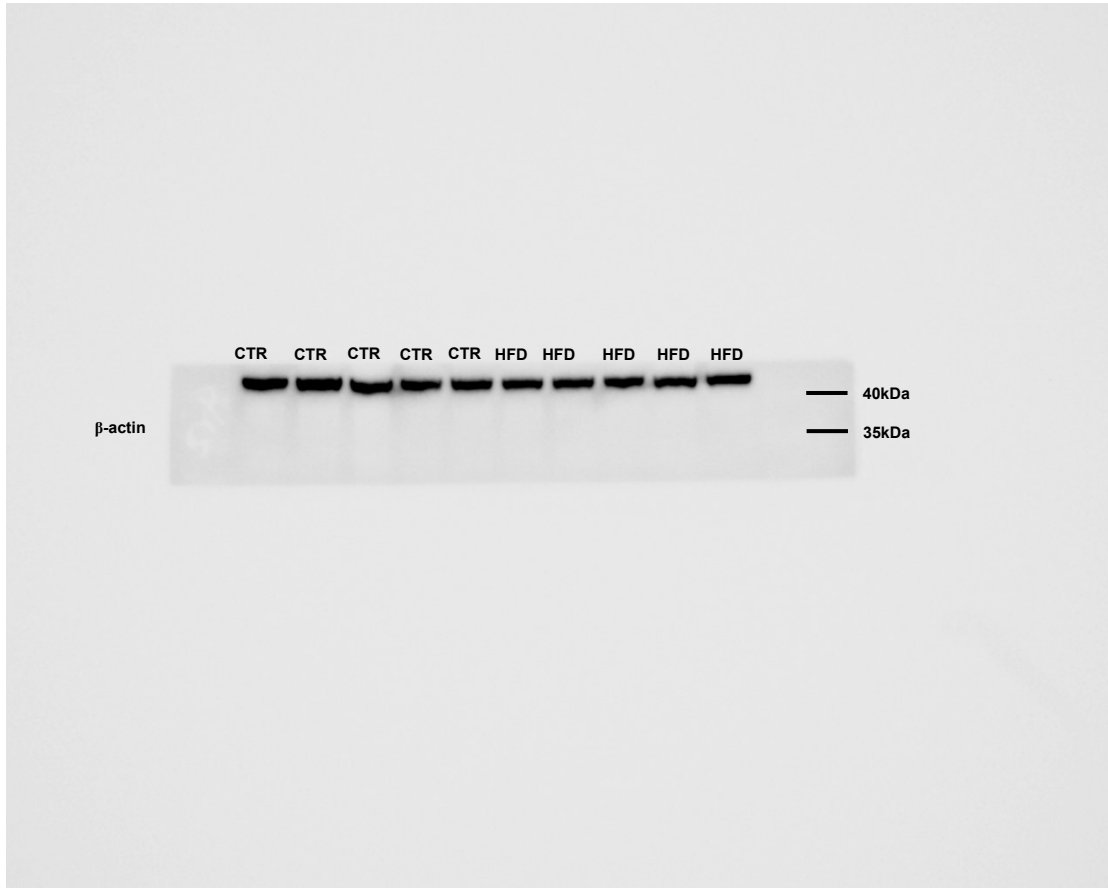

Figure S3 : The full uncropped Gels and Blots images of SYP and β-actin(n=5). HFD resulted in decreased expression of SYP.

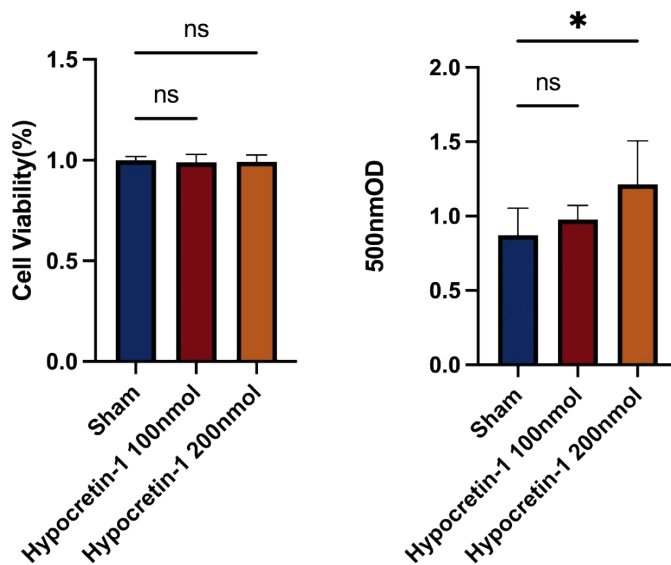

Figure S4: Cell viability assays in 3T3-L1 cells after dosing, hypocretin-1 100nmol and hypocretin-1 200nmol had no significant effect on cell viability. After oil red O staining, the cells were eluted with isopropanol, and the absorbed light intensity was

measured at 500nm using a microplate reader, following gradient experiments, it was determined that 200 nmol Hypocretin-1 was more effective than the control group without exhibiting any cytotoxic effects(n=5).

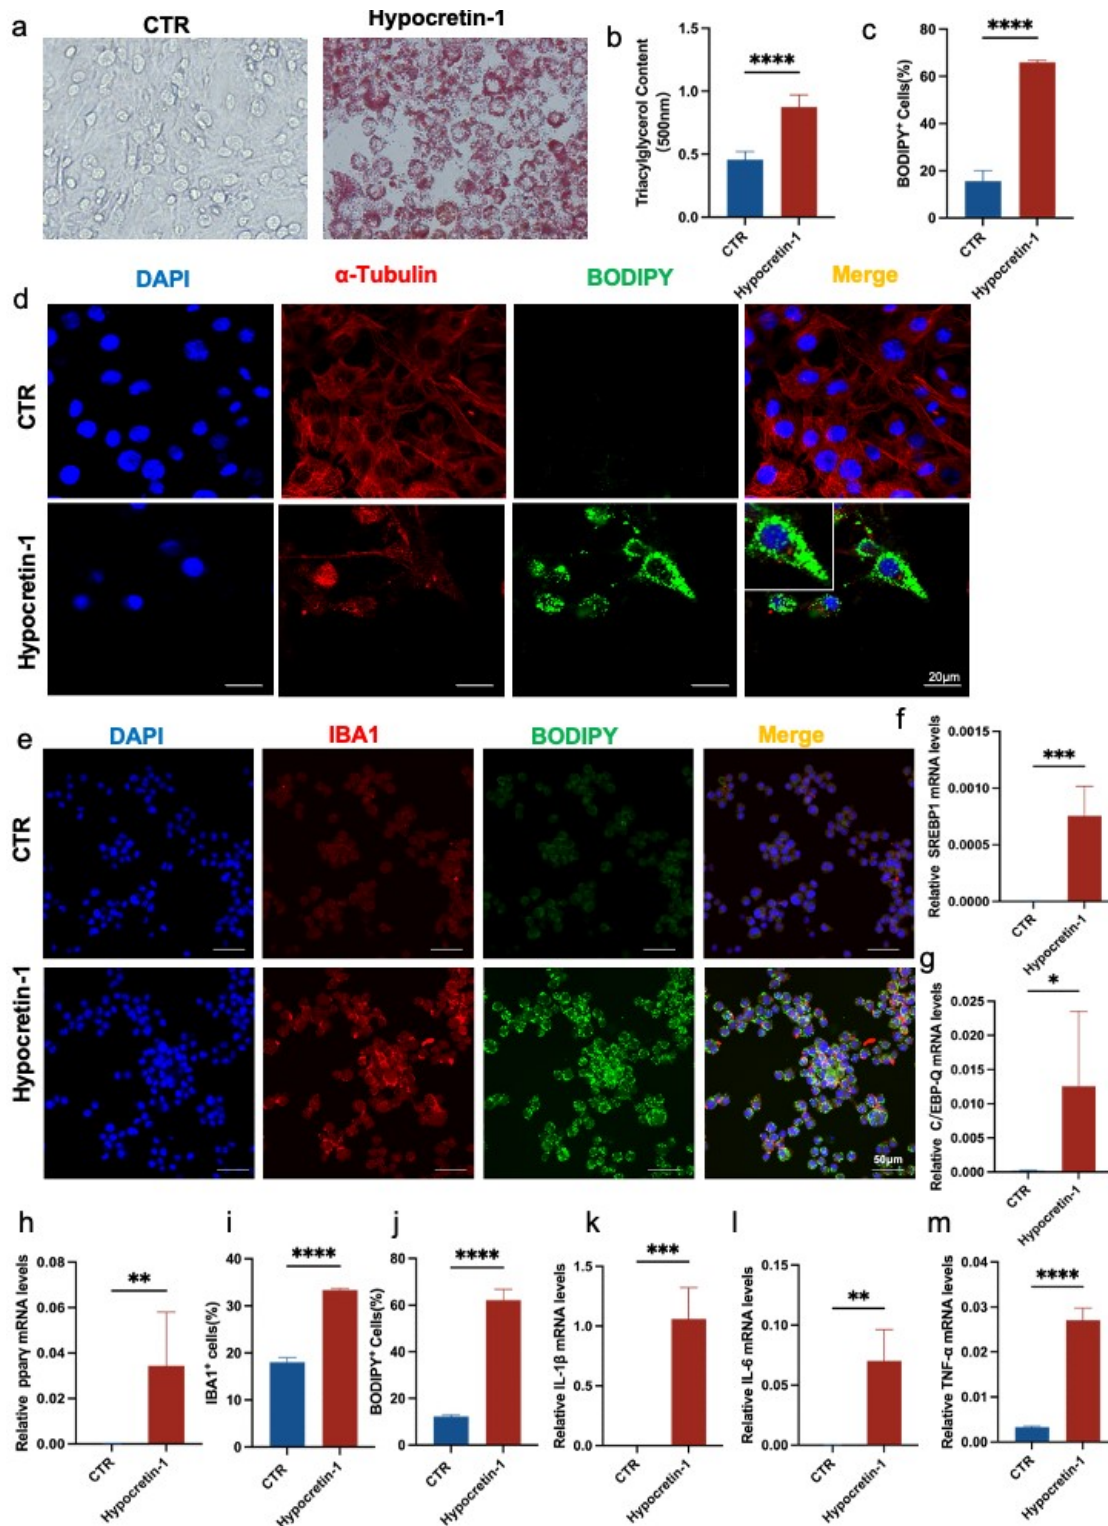

Figure S5: Effects of hypocretin-1 on lipid accumulation in 3T3-L1 cells. a. Oil red O

staining of 3T3-L1 cells. b. After oil red O staining, the cells were eluted with isopropanol, and the absorbed light intensity was measured at 500nm using a microplate reader (n=10). c. Quantification of relative fluorescence intensity for BODIPY (n=4) Immunofluorescence staining of 3T3-L1 cells showed that the hypocretin-1 increase lipid accumulation in 3T3-L1 cell. e. Immunofluorescence (IBA1 and BODIPY) showed that the conditioned medium increased lipid accumulation in BV2 cells; however, IBA1 intensity was altered. F-h. Adipogenic factor mRNA levels (SREBP1, C/EBP-Q, and ppar $\gamma$ ) were measured following differentiation of 3T3-L1 cells. After treatment with a hypocretin-1, mRNA levels of adipogenic factors were significantly increased. I-j. While the BODIPY average fluorescence intensity of BV2 immunofluorescence staining increased between the treatment and CTR groups, the mean fluorescence intensity of IBA1 observed through BV2 immunofluorescence staining of the hypocretin-1 group was significantly higher than that of the model group (n=6). k-m. The mRNA levels of inflammatory factors (IL-6, IL-1 $\beta$ , and TNF- $\alpha$ ) were analyzed. BV2 cells were altered following the introduction of the conditioned medium. Hypocretin-1 treatment notably increased the expression of inflammatory substances (n=5). One Way ANOVA analysis followed by Dunnett's test for post-hoc comparisons., no significant difference n.s. (\*p < 0.05, \*\*p < 0.01, \*\*\*p < 0.001, \*\*\*\*p < 0.0001).
